# Modern-Day SIV Viral Diversity Generated by Extensive Recombination and Cross-Species Transmission.

Sidney M. Bell<sup>1,2,\*</sup>, Trevor Bedford<sup>1</sup>

<sup>1</sup> Vaccine and Infectious Disease Division, Fred Hutchinson Cancer Research Center, Seattle, Washington, United States of America

<sup>2</sup> Molecular and Cellular Biology Program, University of Washington, Seattle, Washington, United States of America

\* Corresponding author

E-mail: [sbell23@fredhutch.org](mailto:sbell23@fredhutch.org) (SB)

# **Abstract**

Cross-species transmission (CST) has led to many devastating epidemics, but is still a poorly understood phenomenon. HIV-1 and HIV-2 (human immunodeficiency virus 1 and 2), which have collectively caused over 35 million deaths, are the result of multiple CSTs from chimpanzees, gorillas, and sooty mangabeys. While the immediate history of HIV is known, there are over 45 lentiviruses that infect specific species of primates, and patterns of host switching are not well characterized. We thus took a phylogenetic approach to better understand the natural history of SIV recombination and CST. We modeled host species as a discrete character trait on the viral phylogeny and inferred historical host switches and the pairwise transmission rates between each pair of 24 primate hosts. We identify 14 novel, well-supported, ancient cross-species transmission events. We also find that lentiviral lineages vary widely in their ability to infect new host species: *SIVcol* (from colobus monkeys) is evolutionarily isolated, while *SIVagms* (from African green monkeys) frequently move between host subspecies. We also examine the origins of *SIVcpz* (the predecessor of HIV-1) in greater detail than previous studies, and find that there are still large portions of the genome with unknown origins. Observed patterns of CST are likely driven by a combination of ecological circumstance and innate immune factors.

## Introduction

As demonstrated by the recent epidemics of EBOV and MERS, and by the global HIV pandemic, viral cross-species transmissions (CST) can be devastating [1,2]. As such, understanding the propensity and ability of viral pathogens to cross the species barrier is of vital public health importance [3]. Of particular interest are transmissions that not only “spillover” into a single individual of a new host species, but that result in a virus actually establishing a sustained chain of transmission and becoming endemic in the new host population (“host switching”).

HIV is the product of not just one successful host switch, but a long chain of host switch events [4,5]. There are two human immunodeficiency viruses, HIV-2 and HIV-1. HIV-2 arose from multiple cross-species transmissions of *SIVsmm* (simian immunodeficiency virus, *sooty mangabey*) from sooty mangabeys to humans [6–8]. HIV-1 is the result of four independent cross-species transmissions from chimpanzees and gorillas. Specifically, *SIVcpz* was transmitted directly from chimpanzees to humans twice; one of these transmissions generated HIV-1 group M, which is the primary cause of the human pandemic [9]. *SIVcpz* was also transmitted once to gorillas [10], generating *SIVgor*, which was in turn transmitted twice to humans [11].

Looking further back, *SIVcpz* itself was also generated by lentiviral host switching and recombination. Based on the SIV sequences available at the time, early studies identified *SIVmon/-mus/-gsn* (which infect mona, mustached, and greater spot-nosed monkeys, respectively) and *SIVrcm* (which infects red-capped mangabeys) as probable donors [12]. Functional analysis of accessory genes from these putative parental lineages indicate that the specific donors and genomic locations of these recombination event(s) were crucial for enabling what became *SIVcpz* to cross the high species barrier and establish an endemic lineage in hominids [13].

The complex evolutionary history resulting in HIV illustrates the importance of natural history to modern day viral diversity, and although the history leading to HIV is well detailed, broader questions regarding cross-species transmission of primate lentiviruses remain [14]. With over 45 known extant primate lentiviruses, each of which is endemic to a specific host species [4,5,15], we sought to charac-

terize the history of viral transmission between these species to the degree possible given the precision allowed from a limited sample of modern-day viruses.

Here, we utilized phylogenetic inference to reconstruct the evolutionary history of primate lentiviral recombination and cross-species transmission. We assembled datasets from publicly available lentiviral genome sequences and conducted discrete trait analyses to infer rates of transmission between primate hosts. We find evidence for extensive interlineage recombination and identify many novel host switches that occurred during the evolutionary history of lentiviruses. We also find that specific lentiviral lineages exhibit a broad range of abilities to cross the species barrier. Finally, we also examined the origins of each region of the *SIVcpz* genome in greater detail than previous studies to yield a more nuanced understanding of its origins.

## Results

**There have been at least 13 interlineage recombination events that confuse the lentiviral phylogeny.**

In order to reconstruct the lentiviral phylogeny, we first had to address the issue of recombination, which is frequent among lentiviruses [16]. In the context of studying cross-species transmission, this is both a challenge and a valuable tool. Evidence of recombination between viral lineages endemic to different hosts is also evidence that at one point in time, viruses from those two lineages were in the same animal (i.e., a cross-species transmission event must have occurred in order to generate the observed recombinant virus). However, this process also results in portions of the viral genome having independent evolutionary—and phylogenetic—histories.

To address the reticulate evolutionary history of SIVs, we set out to identify the extent and nature of recombination between lentiviral lineages. Extensive sequence divergence between lineages masks site-based methods for linkage estimation (Fig. S1). However, topology-based measures of recombination allow for “borrowing” of information across nearby sites, and are effective for this dataset. We thus utilized a phylogenetic model to group segments of shared ancestry separated by recombina-



tion breakpoints instantiated in the HyPhy package GARD [17]. For this analysis, we used a version of the SIV compendium alignment from the Los Alamos National Lab (LANL), modified slightly to reduce the overrepresentation of HIV sequences (N=64, see Methods) [18]. Importantly, because each virus lineage has only a few sequences present in this alignment, these inferences refer to *inter*-lineage recombination, and not the rampant *intra*-lineage recombination common among lentiviruses.

GARD identified 13 locations along the genome that had strong evidence of inter-lineage recombination (Fig. 1). Here, evidence for a particular model is assessed via Akaike Information Criterion (AIC) [19] and differences in AIC between models indicate log probabilities, so that a delta-AIC of 10 between two models would indicate that one model is  $e^{10/2} = \sim 148$  as likely as the other. In our case, delta-AIC values ranged from 154 to 436 for each included breakpoint, indicating that these breakpoints are strongly supported by the underlying tree likelihoods. The 14 resulting segments ranged in length from 351 to 2316 bases; in order to build reliable phylogenies, we omitted two of the less supported breakpoints from downstream analyses, yielding 12 segments ranging in length from 606 – 2316 bases. We found no evidence to suggest linkage between non-neighboring segments (Fig. S2). While it has been previously appreciated that several lineages of SIV are recombinant products [12,20,21], the 13 breakpoints identified here provide evidence that there have been at least 13 inter-lineage recombination events during the evolution of SIVs. Identifying these recombination breakpoints allowed us to construct a putatively valid phylogeny for each segment of the genome that shares an internally cohesive evolutionary history.

# **Most primate lentiviruses were acquired by cross-species transmissions.**

We then looked for phylogenetic evidence of cross-species transmission in the tree topologies of each of the 12 genomic segments. For this and all further analyses, we constructed a dataset from all publicly available primate lentivirus sequences, which we curated and subsampled by host and virus lineage to ensure an equitable distribution of data (see Methods). This primary dataset consists of virus

sequences from the 24 primate hosts with sufficient data available (5 – 25 sequences per viral lineage, N=423, Fig. S3). Alignments used the fixed compendium alignment as a template (see Methods).

In phylogenetic trees of viral sequences, cross-species transmission appears as a mismatch between the host of a virus and the host of that virus's ancestor. To identify this pattern and estimate how frequently each pair of hosts has exchanged lentiviruses, we used the established methods for modeling evolution of discrete traits, as implemented in BEAST [22,23]. In our case, the host of each viral sample was modeled as a discrete trait. This is analogous to treating the “host state” of each viral sample as an extra column in an alignment, and inferring the rate of transition between all pairs of host states along with inferring ancestral host states across the phylogeny. This approach is similar to common phylogeographic approaches that model movement of viruses across discrete spatial regions [24] and has previously been applied to modeling discrete host state in the case of rabies virus [22]. Here, we took a fully Bayesian approach and sought the posterior distribution across phylogenetic trees, host transition rates and ancestral host states. We integrate across model parameters using Markov chain Monte Carlo (MCMC). The resulting model provides phylogenetic trees for each segment annotated with ancestral host states alongside inferred transition rates.

Figure 2 shows reconstructed phylogenies for 3 segments along with inferred ancestral host states. Trees are color coded by known host state at the tips, and inferred host state at internal nodes/branches; color saturation indicates the level of certainty for each ancestral host assignment. A visual example of how the model identifies cross-species transmissions can be seen in the *SIV<sub>mon</sub>/SIV<sub>tal</sub>* clade, which infect mona- and talapoin monkeys, respectively (starred in Fig. 2A-C). Due to the phylogenetic placement of the *SIV<sub>mon</sub>* tips, the internal node at the base of this clade is red, indicating that the host of the ancestral virus was most likely a mona monkey. This contrasts with the host state of the samples isolated from talapoin monkeys (tips in green). These changes in the host state across the tree are what inform our estimates of the rate of transmission between host pairs. In total, the support for each possible transmission is derived from both A) whether the transmission is

supported across the posterior distribution of phylogenies for a particular segment, and B) whether this is true for multiple genomic segments.

Notably, the tree topologies are substantially different between segments, which emphasizes both the extent of recombination and the different evolutionary forces that have shaped the phylogenies of individual portions of the genome. In all segments' trees, we also see frequent changes in the host state between internal nodes (illustrated as changes in color going up the tree), suggestive of frequent ancient cross-species transmissions. On average, primate lentiviruses switch hosts once every 6.25 substitutions per site per lineage across the SIV phylogeny.

The cross-species transmission events inferred by the model are illustrated in Fig. 3, with raw rates and Bayes factors (BF) in Fig. S4. As shown, the model correctly infers the pairs of hosts with previously identified CST events [6,9,11,12,20,21,25,26]. Importantly, we also identify 14 novel cross-species transmission events with strong statistical support (cutoff of  $BF \geq 10.0$ ). Each of these transmissions is clearly and robustly supported by the tree topologies (all 12 trees are illustrated in Fig. S5).

To control for sampling effects, we repeated the analysis with a supplemental dataset built with fewer hosts, and more sequences per host (15 host species, subsampled to 16-40 sequences per viral lineage,  $N=510$ ), and see consistent results. As illustrated in Figs. S6-8, we find qualitatively similar results. When directly comparing the average indicator values, host state transition rates, and BF values between analyses, the results from the main and supplemental datasets are strongly correlated, indicating robust quantitative agreement between the two analyses (Fig. S9). Taken together, these results represent a far more extensive pattern of CST among primate lentiviruses than previously described, with all but a few lineages showing robust evidence of host switching [4,5,14].

However, the distribution of these host switches is not uniform; when we assess the network centrality of each virus we find a broad range (Figs. 3, S6, as node size), indicating some hosts act as sources in the SIV transmission network and other hosts act as sinks. From this, we infer that some viruses have either had greater opportunity or have a greater ability to cross the species barrier than others. In particular, the SIVs from four of the subspecies of African green monkeys (*SIV<sub>sab</sub>*, *SIV<sub>tan</sub>*,

SIV<sub>ver</sub>, SIV<sub>pyg</sub>; collectively, SIV<sub>agm</sub>) appear to exchange viruses with other host species frequently (Fig. 3, 12' o'clock). An example of SIV<sub>agm</sub> CST events can be seen in the tree topologies from *gag*, *prot*, *reverse transcriptase (RT)*, and *vif* (Figs. 2 and S5, segments 2, 3, 4, & 6). Here, SIV<sub>tan</sub> isolates reported by Jin *et al.* (denoted with † in Fig. 2) clearly cluster with SIV<sub>sab</sub>, in a distant part of the phylogeny from the rest of the SIV<sub>agm</sub> viruses (including the majority of SIV<sub>tan</sub> isolates) [20]. For all other segments, however, the SIV<sub>agms</sub> cluster together. We thus concur with the conclusion of Jin *et al.* that these samples represent a recent spillover of SIV<sub>sab</sub> from *sabaeus* monkeys to *tantalus* monkeys, and the model appropriately identifies transmission.

Although SIV<sub>agms</sub> appear to be particularly prone to CST among African green monkeys, nearly every primate clade has at least one inbound, robustly supported viral transmission from another clade. We thus conclude that the majority of lentiviruses have arisen from a process of host switching, followed by a combination of intraclade host switches and host-virus coevolution.

# **SIV<sub>col</sub> appears to be evolutionarily isolated.**

Previous studies of the lentiviral phylogeny have noted that SIV<sub>col</sub> is typically the outgroup to other viral lineages, and have hypothesized that this may implicate SIV<sub>col</sub> as the “original” primate lentivirus [27]. We find this hypothesis plausible, but the evidence remains inconclusive. For the majority of genomic segments, we also observe SIV<sub>col</sub> as the clear outgroup (Figs. 2 and S5). In contrast, for portions of *gag/pol* (segments 3 and 4) and some of the accessory genes (segment 7), we find that there is not a clear outgroup. For these segments, many other lineages of SIV are just as closely related to SIV<sub>col</sub> as they are to each other. However, with the occasional exception of single heterologous taxa with poorly supported placement, SIV<sub>col</sub> remains a monophyletic clade (N=16), and does not intercalate within the genetic diversity of any other lineage in our dataset.

Based on these collective tree topologies, our model does not identify strong evidence for any specific transmissions out of colobus monkeys, and identifies only a single, weakly supported inbound

transmission (likely noise in the model caused by the fact that red-capped mangabeys are the marginal-ly supported root host state; see below). This is consistent with previous findings that the colobinae have a unique variant of the *APOBEC3G* gene, which is known to restrict lentiviral infection and speculated to be a barrier to cross-species transmission [27]. These observations generally support the idea of *SIVcol* as having maintained a specific relationship with its host over evolutionary time. However, we find inconclusive evidence for the hypothesis that *SIVcol* is the most ancient or “source” lineage of primate lentivirus; if this hypothesis were true, then these lentiviral transmissions out of the colobinae must have been followed by extensive recombination that obscures the relationships between *SIVcol* and its descendants.

# ***SIVcpz*, the precursor to HIV-1, has a mosaic origin with unknown segments.**

Unlike *SIVcol*, *SIVcpz* appears to be the product of multiple CSTs and recombination events. *SIVcpz* actually encompasses two viral lineages: *SIVcpzPtt* infects chimpanzees of the subspecies *Pan troglodytes troglodytes*, and *SIVcpzPts* infects chimpanzees of the subspecies *Pan troglodytes schweinfurthii* [28]. There are two additional subspecies of chimpanzees that have not been found harbor an SIV despite extensive surveys, suggesting that *SIVcpzPtt* was acquired after chimpanzee subspeciation [26]. Both previous work [26,28] and our own results support the hypothesis that *SIVcpz* was later transmitted from one chimpanzee subspecies to the other, and *SIVcpzPtt* is the only *SIVcpz* lineage that has crossed into humans. Given the shared ancestry of the two lineages of *SIVcpz*, we use “*SIVcpz*” to refer specifically to *SIVcpzPtt*.

Based on the lentiviral sequences available in 2003, Bailes et al [12] conclude that the *SIVcpz* genome is a recombinant of just two parental lineages. *SIVrcm* (which infects red-capped mangabeys) was identified as the 5’ donor, and an SIV from the *SIVmon/-mus/-gsn* clade (which infect primates in the *Cercopithecus* genus) was identified as the 3’ donor. Since the time of this previous investigation many new lentiviruses have been discovered and sequenced. In incorporating these new data, we find clear evidence that the previous two-donor hypothesis may be incomplete.

The tree topologies from *env* in the 3' end of the genome (segments 8-11) support the previous hypothesis [12] that this region came from a virus in the *SIVmon/-mus/-gsn* clade. These viruses form a clear sister clade to *SIVcpz* with high posterior support (Fig. 2C,D). We find strong evidence for transmissions from mona monkeys (*SIVmon*) to mustached monkeys (*SIVmus*), and from mustached monkeys to greater spot-nosed monkeys (*SIVgsn*) (see discussion of potential coevolution below). We also find more evidence in support of a transmission from mona monkeys to chimpanzees than from the other two potential donors, but more sampling is required to firmly resolve which of these viruses was the original donor of the 3' end of *SIVcpz*.

We find phylogenetic evidence to support the previous hypothesis [12,13] that the *integrase* and *vif* genes of *SIVcpz* (segments 4-6) originated from *SIVrcm*; however, we find *equally strong evidence* to support the competing hypothesis that *pol* came from *SIVmnd-2*, which infects mandrills (Fig. 2B,D). In these portions of the genome, *SIVmnd-2* and *SIVrcm* together form a clear sister clade to *SIVcpz*. The *vpr* gene, in segment 7, is also closely related to both *SIVrcm* and *SIVmnd-2*, but this sister clade also contains *SIVsmm* from sooty mangabeys.

Interestingly, we do *not* find evidence to support either *SIVrcm/mnd-2* or *SIVmon/mus/gsn* as the donor for the 5' most end of the genome (segments 1-5), including the 5' *LTR*, *gag*, and *RT* genes. This is also true for the 3' *LTR* (segment 12). *SIVcpz* lacks a clear sister clade or ancestor in this region, and *SIVrcm* groups in a distant clade; we therefore find no evidence to suggest that an ancestor of an extant *SIVrcm* was the parental lineage of *SIVcpz* in the 5' most end of the viral genome as previously believed (Fig. 2A,D). This may support the possibility of a third parental lineage, or a number of other plausible scenarios (discussed below).

## Discussion

### Limitations and strengths of the model

*Additional sampling is required to fully resolve the history of CST among lentiviruses.*

In addition to the 14 strongly supported novel transmissions (BF  $\geq 10$ ) described above, we also find substantial evidence for an additional 8 possible novel transitions, but with lower support (BF  $\geq 3$ ) (Fig. 3, S4). These transmissions are more difficult to assess, because many of them are inferred on the basis of just a few “outlier” tips of the tree that group apart from the majority of viral samples from the same lineage. In each case, the tips’ phylogenetic position is strongly supported, and the primary literature associated with the collection of each of these “outlier” samples clearly specifies the host metadata. However, due to the limited number of lentiviral sequences available for some hosts, we are unable to control for sampling effects for some of these lower-certainty transmissions. We report them here because it is unclear whether these outliers are the result of unidentified separate endemic lineages, one-time spillovers from other hosts, or species misidentification during sample collection. It is also important to note that while some of these less-supported transmissions are potentially sampling artifacts, many of them may be real, and may be less supported simply because they lack the requisite available data for some genome segments. Ultimately, far more extensive sampling of primate lentiviruses is required in order to resolve these instances.

*Most lentiviruses were originally acquired by CST and have since coevolved with their hosts.*

Some of these “noisier” transmission inferences, particularly within the same primate clade, may be the result of coevolution, ie. lineage tracking of viral lineages alongside host speciation. Within the model, viral jumps into the *common ancestor* of two extant primate species appear as a jump into *one* of the extant species, with a secondary jump between the two descendants. For example, the model infers a jump from mona monkeys into mustached monkeys, with a secondary jump from mustached monkeys into their sister species, red-tailed guenons (Fig. 3). Comparing the virus and host phylogenies, we observe that this host tree bifurcation between mustached monkeys and red-tailed guenons is mirrored in the virus tree bifurcation between SIV<sub>mus</sub> and SIV<sub>rtg</sub> for most segments of the viral genome (Figs. 2, 3). This heuristically suggests that the true natural history may be an ancient viral



transmission from mona monkeys into the common ancestor of mustached monkeys and red-tailed  
guenons, followed by host/virus coevolution during primate speciation to yield SIV<sub>mus</sub> and SIV<sub>rtg</sub>.

The possibility of virus/host coevolution means that while we also observe extensive host  
switching *between* primate clades, many of the observed jumps *within* a primate clade may be the re-  
sult of host-virus coevolution. However, we also note that the species barrier is likely lower between  
closely related primates, making it challenging to rigorously disentangle coevolution vs. true host  
switches within a primate clade [29].

*The model propagates and accounts for residual uncertainty from the recombination analyses.*

The deep phylogenies and extensive sequence divergence between SIV lineages makes any  
assessment of recombination imperfect. Our analysis aims to 1) place a lower bound on the number of  
interlineage recombination events that must have occurred to explain the observed extant viruses, and  
2) use this understanding to construct a model of CST among these viruses. As the most well devel-  
oped package currently available for topology-based recombination analysis, GARD was an appropri-  
ate choice to identify in broad strokes the extent and nature of recombination among SIVs. Some  
(though not all) of the remaining uncertainty as to the exact location of breakpoints is represented within  
the posterior distribution of trees for each segment, and is thus propagated and accounted for in the  
discrete traits model (inferences of CST). Most other studies of SIV evolutionary history simply split the  
phylogeny along gene boundaries or ignore recombination (e.g., [5,12,29]). Thus, while there is still  
some remaining uncertainty in our recombination analyses, these results still represent a major step  
forward in attempting to systematically assess recombination among all extant SIV lineages and to in-  
corporate it into the phylogenetic reconstruction.

**Cross-species transmission is driven by exposure and constrained by host genetic distance.**

Paleovirology and, more recently, statistical models of lentiviral evolution estimate that primate  
lentiviruses share a common ancestor approximately 5-10 million years ago [27,30,31]. This, along with



the putative viral coevolution during primate speciation, suggests that many of these transmissions were ancient, and have been acted on by selection for millions of years. Thus, given that the observed transmissions almost exclusively represent evolutionarily successful host switches, it is remarkable that lentiviruses have been able to repeatedly adapt to so many new host species. In the context of this vast evolutionary timescale, however, we conclude that while lentiviruses have a far more extensive history of host switching than previously understood, these events remain relatively rare overall.

Looking more closely at the distribution of host switching among lineages, it is clear that some viruses have crossed the species barrier with far greater frequency than others. This is likely governed by both ecological and biological factors. Ecologically, frequency and form of exposure are likely key determinants of transmission, but these relationships can be difficult to describe statistically [3]. For example, many primates are chronically exposed to many exogenous lentiviruses through predation [32]. Using log body mass ratios [33] as a proxy for predation, we do not see a statistically significant association between body mass ratio and non-zero transmission rate (Fig. 4A, blue;  $p=0.678$ , coef. 95% CI (-0.311, 0.202)). We believe the lack of signal is likely due to the imperfect proxy, although it is also possible that predator-prey relationships do not strongly structure the CST network.

Biologically, increasing host genetic distance has a clear negative association with the probability of cross-species transmission (Fig. 4B, blue,  $p<0.001$ , coef. 95% CI (-7.633, -2.213)). Importantly, as already discussed, the strength of this association may be inflated by instances of lineage tracking (virus/host cospeciation). However, it is well established that increasing host genetic distance is associated with a higher species barrier; as previously documented in the literature (reviewed in [34]), we expect this is largely due to the divergence of host restriction factor genes, which are key components of the innate immune system. Functional assays of these host restriction factors against panels of SIVs, while outside the scope of this study, will be important for further identifying the molecular bases of the species barriers that have led to the transmission patterns identified here.

## Origins of HIV-1 and HIV-2

*Epidemiological factors were key to the early spread of HIV.*

Understanding the underlying dynamics of lentiviral CST provides important biological context to the transmissions that generated the HIV pandemic. As discussed above, our results support a view of lentiviral cross-species transmission as a rare event. Notably, only two lentiviruses have crossed the high species barrier from Old World monkeys into hominids: SIV<sub>smm</sub> and the recombinant SIV<sub>cpz</sub>. Both HIV-1 and HIV-2 have arisen in human populations in the last century [5,35]. While it is possible that this has occurred by chance, even without increased primate exposure or other risk factors, we nevertheless find it striking that humans would acquire two exogenous viruses within such a short evolutionary timespan.

Examining this phenomenon more closely, the history of HIV-2 is enlightening. HIV-2 has been acquired through at least 8 *independent* spillover events from sooty mangabeys [5]. Notably, 6 of these transmissions have resulted in only a single observed infection (spillovers) [7,8,36]; only 2 of these events have established sustained transmission chains and successfully switched hosts to become endemic human pathogens [37–40]. Given this pattern, it is conceivable that there have been many isolated introductions of lentiviruses into humans over the past 200,000 years [14,41]. However, these other viral exposures did not result in new endemic human pathogens either because of species-specific immune barriers, non-conducive epidemiological conditions, or a combination thereof. The rapid and repeated emergence of HIV-1 and HIV-2 is on a timescale more congruent with changes in epidemiological conditions than mammalian evolution, perhaps emphasizing the importance of the concurrent changes in human population structure and urbanization in facilitating the early spread of the epidemic [35]. Significantly, though, this also highlights the importance of careful public health surveillance and interventions to prevent future epidemics of zoonotic viruses.

*The exact origins of SIV<sub>cpz</sub> may not be identifiable.*

The ancestry of SIV<sub>cpz</sub> appears to be tripartite: the unknown ancestry of the 5' end; the putatively SIV<sub>rcm</sub> or SIV<sub>mnd-2</sub> derived *int* and *vif* genes; and the putatively SIV<sub>gsn/mon/mus</sub> derived 3' end of the genome. For any of these three portions of the genome, there are multiple evolutionary histories supported by available sequence data. However, it is possible that further sampling of lentivirus lineages (both known and currently undiscovered) will be able to definitively resolve the ancestry of SIV<sub>cpz</sub>. Alternatively, it may be that the ancestral virus(es) that gave rise to any of these three portions is extinct. In the case of the last two portions of the SIV<sub>cpz</sub> genome, it may be that the common ancestor of these putative genetic donors (SIV<sub>rcm/mnd-2</sub> and SIV<sub>mon/mus/gsn</sub>, respectively) was the true source. However, it is also a distinct possibility that SIV<sub>cpz</sub> has sufficiently diverged since its acquisition by chimpanzees such that its history is obscured.

#### *Evolutionary time obscures the identity of the "original" primate lentivirus.*

Among primates, our results clearly illustrate that the vast majority of lentiviral lineages were originally acquired by cross-species transmission. It is intriguing to speculate as to which virus was the "original" source of all of these lineages. Because of its consistent position as the outgroup of primate lentiviral trees, there has long been a popular hypothesis in the field that SIV<sub>col</sub> was this original lentivirus among primates [27]. While SIV<sub>col</sub> is certainly the most evolutionary isolated extant lentivirus that has been sampled to date, this does not definitively place it as the ancestral lentivirus. Alternative scenarios (also noted by Compton *et al.*) include an extinct original lentiviral lineage (and/or primate host species) or an unsampled ancestral lentivirus. It is also plausible that another known extant lentivirus was the "original" lineage, but has diverged and/or recombined to such an extent that its origins are obscured.

#### *Conclusions*

Here, we have shown that lentiviruses have a far more extensive history of host switching than previously described. Our findings also demonstrate that the propensity of each lentiviral lineage to

360 switch between distant hosts, or to spillover among related hosts, is highly variable. In examining spe-  
 361 cific lineages, our findings are consistent with the prevalent hypothesis that *SIVcol* has evolved in isola-  
 362 tion from other SIVs. Contrastingly, we have also demonstrated that the mosaic origins of *SIVcpz* are  
 363 far more complex than previously recognized; the currently available sequence data is unable to re-  
 364 solve the ancestry of nearly half of the *SIVcpz* genome. Together, our analyses move closer to a full  
 365 understanding of the pattern of cross-species transmission among primate lentiviruses, but additional  
 366 efforts to obtain high quality viral genome sequences from under sampled lineages will be necessary to  
 367 fully resolve the natural history of these viruses.

## Methods

All datasets, config files, documentation, and scripts used in this analysis or to generate figures are available publicly at <https://github.com/blab/siv-cst>.

## Datasets & Alignments

Lentiviral genomes are translated in multiple reading frames; we therefore utilized nucleotide sequence data for all analyses.

### *Recombination*

For all recombination analyses (GARD,  $R^2$ , rSPR), we used the 2015 Los Alamos National Lab (LANL) HIV/SIV Compendium [18]. The compendium is a carefully curated alignment of high-quality, representative sequences from each known SIV lineage and each group of HIV-1 and HIV-2. We reduced the overrepresentation of HIV in this dataset, but maintained at least one high quality sample from each group of HIV. In total, this dataset contains 64 sequences from 24 hosts (1-10 sequences per host). Maximum likelihood trees for each segment—used for the rSPR analysis and displayed in Figure 1—were built with RAxML v.8.2.9 [42] with the rapid bootstrapping algorithm under a GTR model with 25 discrete bins of site to site rate variation and were rooted to SIVcol.

### *Main & Supplemental Datasets*

Primate lentiviral sequences were downloaded from the comprehensive LANL HIV sequence database [18]. Sequences from lineages known to be the result of artificial cross-species transmissions (SIVmac, -stm, -mne, and -wcm) were excluded. We also excluded any sequences shorter than 500 bases or that were flagged as problematic by standard LANL criteria. We grouped host subspecies together except for cases where there is a known specific relationship between host subspecies and virus lineage (chimpanzees and African green monkeys). To construct datasets with a more equitable distribution of sequences per host, we preferentially subsampled sequences from the LANL Compendium,

followed by samples isolated from Africa (more likely to be primary sequences), and finally supplementing with samples isolated elsewhere (excluding experimentally generated sequences). For humans, mandrils and mustached monkeys, which are host to 2, 2 and 3 distinct viral lineages, respectively, we allowed a few additional sequences (if available) to represent the full breadth of documented lentiviral diversity. The “main” dataset consists of 24 host species, with 5-31 sequences per host (total N=422). As an alternative dataset to control for sampling bias and data availability, we also constructed a “supplemental” dataset with just 15 hosts but with more viral sequences per host (16 – 40 sequences per lineage, N=510).

### *Alignments*

Alignments were done with the L-INSI algorithm implemented in mafft v7.294b [43]; the Compendium alignment was held fixed, with other sequences aligned to this template. Insertions relative to the fixed compendium were discarded. This alignment was then split along the breakpoints identified by GARD to yield the segment-specific alignments.

### **Recombination**

#### *Topology-Based Analysis*

Each portion of the genome was analyzed with the Genetic Algorithm for Recombination Detection (GARD), implemented in HyPhy v.2.2.0 [17], with a nucleotide model selected by HyPhy’s NucModelCompare package (#012234) and general discrete distribution (3 bins) of site variation.

Computational intensity was eased by analyzing the recombination dataset in 3kb long portions, with 1kb overlaps on either end (e.g., bases 1:3000, 2000:5000, 4000:7000, etc.). To control for sites’ proximity to the ends of the genomic portion being analyzed, this was repeated with the windows offset (e.g., bases 1:2500, 1500:4500, 3500:6500, etc.). In total, this resulted in every site of the alignment being analyzed at least two-fold, with at least one of these replicates providing 500-1500 bases of genomic context on either side (other than at the very ends of the total alignment). Disagreement be-

tween window-offset replicates for a given breakpoint were minimal and almost always agreed within a few bases, with two exceptions: offset replicates for the breakpoint between segments 7 and 8 disagreed by 529 bases, and offset replicates for the breakpoint between 8 and 9 disagreed by 263 bases. In these instances, we used the average site placement.

### *Sitewise Linkage Analysis*

Biallelic sites were identified across the genome (ignoring gap characters and polymorphisms present at <5%). These biallelic sites were compared pairwise to generate an observed and expected distribution of haplotypes (combinations of alleles between the two sites), and assessed with the statistic  $R^2 = \chi^2 / (d \cdot N)$ , where  $\chi^2$  is chi-square,  $d$  is the degrees of freedom, and  $N$  is the number of haplotypes for this pair of sites [44]. This statistic follows the canonical interpretation of  $R^2$ , i.e., if the allele at site 1 is known, how well does it predict the allele at site 2 (0 indicating no linkage between sites, and 1 indicating perfect linkage).

### *Segment Linkage Analysis*

Segment linkage was assessed by comparing the similarity of tree topologies between segments. This was done with the pairwise method in the Rooted Subtree-Prune-and-Regraft (rSPR) package [45], which measures the number of steps required to transform one topology into another. Segment pairs with similar topologies have lower scores than segments with less similar topologies.

## **Phylogenies & Discrete Trait Analysis**

### *Empirical tree distributions*

For each segment alignment, a posterior distribution of trees was generated with BEAST v. 1.8.2 under a general time reversible substitution model with gamma distributed rate variation and a strict molecular clock [46]. We used a Yule birth-death speciation model tree prior [47]; all other priors were defaults. Trees were estimated using a Markov chain Monte Carlo (MCMC). The main dataset

was run for 25 million steps, sampled every 15,000 states after discarding the first 10% as burnin, resulting in ~1600 trees per segment in the posterior distribution. Convergence was determined by visually inspecting the trace in Tracer v. 1.6.0 [48]. All but two effective sample size (ESS) values (segment 2: AG substitution rate [ESS=164] and frequencies 4 [ESS=189]) were well over 200. The supplemental dataset was run for 65 million steps, sampled every 15,000 states after discarding the first 10% as burnin (~3900 trees per segment in the posterior distribution). Convergence was again determined in Tracer. All ESS values except for the AG substitution rate in segment 2 (ESS=190) were well above 200.

### *Discrete Trait Analysis*

These tree distributions were used to estimate the transmission network. As in Faria *et al.* [22], we model hosts as states of a discrete trait, and model cross-species transmission as a stochastic diffusion process among  $n$  host states. We use a non-reversible state transition matrix with  $n \times (n-1)$  individual transition parameters [49]. We also utilize standard methodology in using a Bayesian stochastic search variable selection process to encourage a sparse network, implemented as in [23]. An exponential distribution with mean=1.0 was used as a prior on each of the pairwise rate parameters (552 in total for the main dataset with 24 hosts; 210 parameters in total for the supplemental dataset with 15 hosts). The prior placed on the *sum* of the binary indicator variables corresponding to each pairwise rate parameter (i.e., the number of transitions that are non-zero) was an exponential distribution with mean=20. Convergence was again assessed by visually inspecting the log files in Tracer. The main dataset MCMC chain was run for 25 million steps and sampled every 5,000 steps after discarding the first 5 million steps as burnin. The supplemental dataset MCMC chain was run for 45 million steps and sampled every 5,000 steps after discarding the first 20 million steps as burnin. For both datasets, more than 97% of the rate, indicator, and actualRate (stepwise rate\*indicator values) parameters had an ESS well over 200 (most > 1000).



471           Statistical support for each transmission is summarized as a Bayes factor (BF), calculated by  
472    comparing the posterior and prior odds that a given rate is non-zero (i.e., that there has been *any*  
473    transmission between a given pair of hosts) [23]. The ancestral tree likelihoods of each of the 12 tree  
474    distributions contribute equally to the inference of a shared transmission rate matrix. However, not eve-  
475    ry lineage has recombined along every breakpoint, which means that the tree likelihoods from each  
476    segment are not fully statistically independent. Thus, we report conservative estimates of BF by dividing  
477    all BF values by 12.  
478

## 479 **Acknowledgements**

480 We thank Michael Emerman, Janet Young, Gytis Dudas, Chris Whidden, and the Emerman and Bed-  
 481 ford labs for their help. We also acknowledge the Los Alamos National Labs HIV database, which pro-  
 482 vided the curated data for this study. T.B. is a Pew Biomedical Scholar and his work is supported by  
 483 NIH award R35 GM119774-01. S.B. is a NSF Graduate Research Fellow and her work is supported by  
 484 NSF grant [DGE-1256082](#) and [NIH training grant](#) 5-T32-CA-80416-17.

485

486

487

488

489

- 490 1. Morens D, Folkers G, Fauci A. Emerging infections: a perpetual challenge. In: LANCET INFEC-  
491 TIOUS DISEASES [Internet]. 2008 [cited 11 Aug 2015] pp. 710–719. doi:10.1016/S1473-  
492 3099(08)70256-1
- 493
- 494 2. Parrish CR, Holmes EC, Morens DM, Park E-C, Burke DS, Calisher CH, et al. Cross-species vi-  
495 rus transmission and the emergence of new epidemic diseases. Microbiol Mol Biol Rev. 2008;72:  
496 457–70. doi:10.1128/MMBR.00004-08
- 497
- 498 3. Locatelli S, Peeters M. Cross-species transmission of simian retroviruses: how and why they  
499 could lead to the emergence of new diseases in the human population. AIDS. 2012;26: 659–73.  
500 doi:10.1097/QAD.0b013e328350fb68
- 501
- 502 4. Apetrei C, Robertson DL, Marx PA. The history of SIVS and AIDS: epidemiology, phylogeny and  
503 biology of isolates from naturally SIV infected non-human primates (NHP) in Africa. Front Biosci.  
504 2004;9: 225–54. Available: <http://www.ncbi.nlm.nih.gov/pubmed/14766362>
- 505
- 506 5. Sharp PM, Hahn BH. Origins of HIV and the AIDS pandemic. Cold Spring Harb Perspect Med.  
507 2011;1: a006841. doi:10.1101/cshperspect.a006841
- 508
- 509 6. Hirsch VM, Olmsted RA, Murphey-Corb M, Purcell RH, Johnson PR. An African primate lentivi-  
510 rus (SIVsm) closely related to HIV-2. Nature. 1989;339: 389–92. doi:10.1038/339389a0
- 511
- 512 7. Gao F, Yue L, White AT, Pappas PG, Barchue J, Hanson AP, et al. Human infection by genet-

ically diverse SIVSM-related HIV-2 in west Africa. *Nature*. 1992;358: 495–9.

doi:10.1038/358495a0

8. Chen Z, Telfier P, Gettie A, Reed P, Zhang L, Ho DD, et al. Genetic characterization of new West African simian immunodeficiency virus SIVsm: geographic clustering of household-derived SIV strains with human immunodeficiency virus type 2 subtypes and genetically diverse viruses from a single feral sooty mangabey t. *J Virol*. 1996;70: 3617–27. Available: <http://www.pubmedcentral.nih.gov/articlerender.fcgi?artid=190237&tool=pmcentrez&rendertype=abstract>

9. Gao F, Bailes E, Robertson DL, Chen Y, Rodenburg CM, Michael SF, et al. Origin of HIV-1 in the chimpanzee *Pan troglodytes troglodytes*. *Nature*. 1999;397: 436–41. doi:10.1038/17130

10. Van Heuverswyn F, Li Y, Neel C, Bailes E, Keele BF, Liu W, et al. Human immunodeficiency viruses: SIV infection in wild gorillas. *Nature*. 2006;444: 164. doi:10.1038/444164a

11. D'arc M, Ayoub A, Esteban A, Learn GH, Boué V, Liegeois F, et al. Origin of the HIV-1 group O epidemic in western lowland gorillas. *Proc Natl Acad Sci*. 2015;112: 201502022. doi:10.1073/pnas.1502022112

12. Etienne L, Hahn BH, Sharp PM, Matsen FA, Emerman M. Gene loss and adaptation to hominids underlie the ancient origin of HIV-1. *Cell Host Microbe*. 2013;14: 85–92. doi:10.1016/j.chom.2013.06.002

13. Bailes E, Gao F, Bibollet-Ruche F, Courgnaud V, Peeters M, Marx PA, et al. Hybrid Origin of SIV in Chimpanzees. *Science* (80- ). 2003;300.
14. Aghokeng AF, Ayoub A, Mpoudi-Ngole E, Loul S, Liegeois F, Delaporte E, et al. Extensive survey on the prevalence and genetic diversity of SIVs in primate bushmeat provides insights into risks for potential new cross-species transmissions. *Infect Genet Evol.* 2010;10: 386–96. doi:10.1016/j.meegid.2009.04.014
15. Gifford RJ. Viral evolution in deep time: Lentiviruses and mammals. *Trends in Genetics.* 2012. pp. 89–100. doi:10.1016/j.tig.2011.11.003
16. Chen J, Powell D, Hu W-S. High frequency of genetic recombination is a common feature of primate lentivirus replication. *J Virol.* 2006;80: 9651–8. doi:10.1128/JVI.00936-06
17. Kosakovsky Pond SL, Posada D, Gravenor MB, Woelk CH, Frost SDW. Automated phylogenetic detection of recombination using a genetic algorithm. *Mol Biol Evol.* 2006;23: 1891–901. doi:10.1093/molbev/msl051
18. Los Alamos SIV/HIV Sequence Database [Internet]. 2015 [cited 11 Aug 2015]. Available: <http://www.hiv.lanl.gov/content/index>
19. Jin MJ, Hui H, Robertson DL, Müller MC, Barré-Sinoussi F, Hirsch VM, et al. Mosaic genome structure of simian immunodeficiency virus from west African green monkeys. *EMBO J.* 1994;13: 2935–47. Available: <http://www.ncbi.nlm.nih.gov/pubmed/8026477>

561

562 20. Souquière S, Bibollet-Ruche F, Robertson DL, Makuwa M, Apetrei C, Onanga R, et al. Wild  
563 *Mandrillus sphinx* are carriers of two types of lentivirus. *J Virol. American Society for Microbiolo-*  
564 *gy (ASM)*; 2001;75: 7086–96. doi:10.1128/JVI.75.15.7086-7096.2001

565

566 21. Faria NR, Suchard MA, Rambaut A, Streicker DG, Lemey P. Simultaneously reconstructing viral  
567 cross-species transmission history and identifying the underlying constraints. *Philos Trans R Soc*  
568 *Lond B Biol Sci.* 2013;368: Supplementary Text 1. doi:10.1098/rstb.2012.0196

569

570 22. Lemey P, Rambaut A, Drummond AJ, Suchard MA. Bayesian Phylogeography Finds Its Roots.  
571 Fraser C, editor. *PLoS Comput Biol. Public Library of Science*; 2009;5: e1000520.  
572 doi:10.1371/journal.pcbi.1000520

573

574 23. Jin MJ, Rogers J, Phillips-Conroy JE, Allan JS, Desrosiers RC, Shaw GM, et al. Infection of a  
575 yellow baboon with simian immunodeficiency virus from African green monkeys: evidence for  
576 cross-species transmission in the wild. *J Virol. American Society for Microbiology (ASM)*;  
577 1994;68: 8454–60. Available: <http://www.ncbi.nlm.nih.gov/pubmed/7966642>

578

579 24. Leitner T, Dazza M-C, Ekwilanga M, Apetrei C, Saragosti S. Sequence diversity among chim-  
580 panzee simian immunodeficiency viruses (SIVcpz) suggests that SIVcpzP<sub>ts</sub> was derived from  
581 SIVcpzP<sub>tt</sub> through additional recombination events. *AIDS Res Hum Retroviruses. Mary Ann*  
582 *Liebert, Inc. 2 Madison Avenue Larchmont, NY 10538 USA*; 2007;23: 1114–8.  
583 doi:10.1089/aid.2007.0071

584

- 585 25. Compton AA, Emerman M. Convergence and divergence in the evolution of the APOBEC3G-Vif  
586 interaction reveal ancient origins of simian immunodeficiency viruses. PLoS Pathog. 2013;9:  
587 e1003135. doi:10.1371/journal.ppat.1003135  
588
- 589 26. Charleston MA, Robertson DL. Preferential host switching by primate lentiviruses can account  
590 for phylogenetic similarity with the primate phylogeny. Syst Biol. 2002;51: 528–35.  
591 doi:10.1080/10635150290069940  
592
- 593 27. Aiewsakun P, Katzourakis A. Time-Dependent Rate Phenomenon in Viruses. J Virol. American  
594 Society for Microbiology; 2016;90: 7184–95. doi:10.1128/JVI.00593-16  
595
- 596 28. Nerrienet E, Amouretti X, Müller-Trutwin MC, Poaty-Mavoungou V, Bedjebaga I, Nguyen HT, et  
597 al. Phylogenetic analysis of SIV and STLV type I in mandrills (*Mandrillus sphinx*): indications that  
598 intracolony transmissions are predominantly the result of male-to-male aggressive contacts.  
599 AIDS Res Hum Retroviruses. 1998;14: 785–96. doi:10.1089/aid.1998.14.785  
600
- 601 29. Harris RS, Hultquist JF, Evans DT. The restriction factors of human immunodeficiency virus. J  
602 Biol Chem. 2012;287: 40875–83. doi:10.1074/jbc.R112.416925  
603
- 604 30. Chen Z, Luckay A, Sodora DL, Telfer P, Reed P, Gettie A, et al. Human immunodeficiency virus  
605 type 2 (HIV-2) seroprevalence and characterization of a distinct HIV-2 genetic subtype from the  
606 natural range of simian immunodeficiency virus-infected sooty mangabeys. J Virol. 1997;71:  
607 3953–60. Available: <http://www.ncbi.nlm.nih.gov/pubmed/9094672>  
608

- 609 31. Pieniazek D, Ellenberger D, Janini LM, Ramos AC, Nkengasong J, Sassan-Morokro M, et al.  
610 Predominance of human immunodeficiency virus type 2 subtype B in Abidjan, Ivory Coast. AIDS  
611 Res Hum Retroviruses. 1999;15: 603–8. doi:10.1089/088922299311132  
612
- 613 32. Ishikawa K, Janssens W, Banor JS, Shinno T, Piedade J, Sata T, et al. Genetic analysis of HIV  
614 type 2 from Ghana and Guinea-Bissau, West Africa. AIDS Res Hum Retroviruses. 2001;17:  
615 1661–3. doi:10.1089/088922201753342077  
616
- 617 33. Peeters M, Toure-Kane C, Nkengasong JN. Genetic diversity of HIV in Africa: impact on diagno-  
618 sis, treatment, vaccine development and trials. AIDS. 2003;17: 2547–60.  
619 doi:10.1097/01.aids.0000096895.73209.89  
620
- 621 34. Damond F, Descamps D, Farfara I, Telles JN, Puyeo S, Campa P, et al. Quantification of proviral  
622 load of human immunodeficiency virus type 2 subtypes A and B using real-time PCR. J Clin Mi-  
623 crobiol. 2001;39: 4264–8. doi:10.1128/JCM.39.12.4264-4268.2001  
624
- 625 35. Apetrei C, Gaufin T, Gautam R, Vinton C, Hirsch V, Lewis M, et al. Pattern of SIVagm Infection in  
626 Patas Monkeys Suggests that Host Adaptation to Simian Immunodeficiency Virus Infection May  
627 Result in Resistance to Infection and Virus Extinction. J Infect Dis. Oxford University Press;  
628 2010;202: S371–S376. doi:10.1086/655970  
629
- 630 36. Gifford RJ. Viral evolution in deep time: lentiviruses and mammals. Trends Genet. 2012;28: 89–  
631 100. doi:10.1016/j.tig.2011.11.003  
632



- 633 37. Compton A a., Emerman M. Convergence and Divergence in the Evolution of the APOBEC3G-  
634 Vif Interaction Reveal Ancient Origins of Simian Immunodeficiency Viruses. PLoS Pathog.  
635 2013;9. doi:10.1371/journal.ppat.1003135  
636
- 637 38. Katoh K, Standley DM. MAFFT multiple sequence alignment software version 7: improvements  
638 in performance and usability. Mol Biol Evol. Oxford University Press; 2013;30: 772–80.  
639 doi:10.1093/molbev/mst010  
640
- 641 39. Whidden C, Matsen FA. Ricci-Ollivier Curvature of the Rooted Phylogenetic Subtree-Prune-  
642 Regraft Graph. 2015; Available: <http://arxiv.org/abs/1504.00304>  
643
- 644 40. Drummond AJ, Suchard MA, Xie D, Rambaut A. Bayesian phylogenetics with BEAUti and the  
645 BEAST 1.7. Mol Biol Evol. 2012;29: 1969–73. doi:10.1093/molbev/mss075

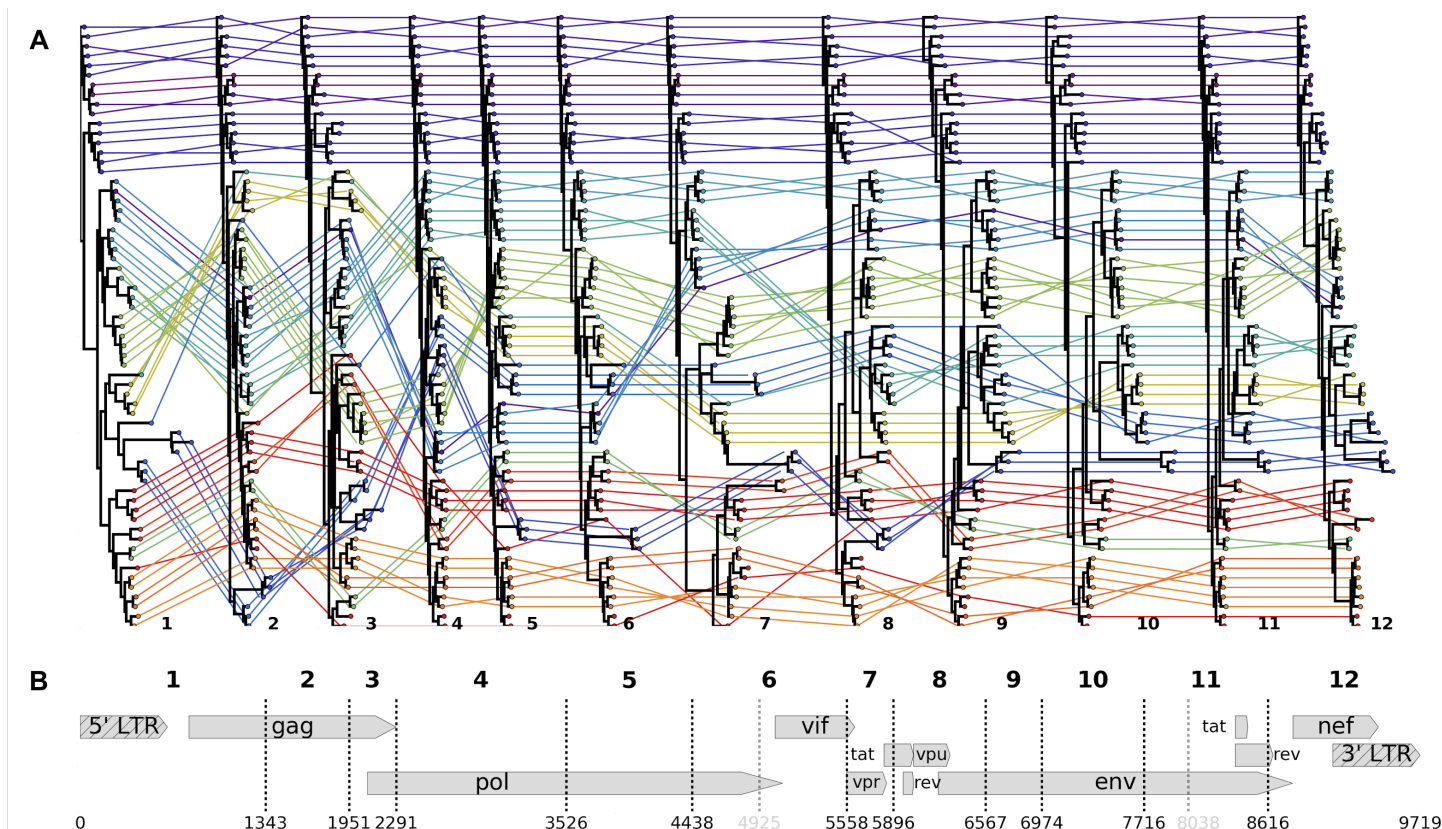

**Figure 1: There have been at least 13 interlineage recombination events among SIVs.**

The SIV LANL compendium, slightly modified to reduce overrepresentation of HIV, was analyzed with GARD to identify the 13 recombination breakpoints across the genome (dashed lines in **B**; numbering according to the accepted HXB2 reference genome--accession K03455, illustrated). Two of these breakpoints were omitted from further analyses because they created extremely short fragments (< 500 bases; gray dashes in **B**). For each of the 11 remaining breakpoints used in further analyses, we split the compendium alignment along these breakpoints and built a maximum likelihood tree, displayed in **A**. Each viral sequence is color-coded by host species, and its phylogenetic position is traced between trees. Heuristically, straight, horizontal colored lines indicate congruent topological positions between trees (likely not a recombinant sequence); criss-crossing colored lines indicate incongruent topological positions between trees (likely a recombinant sequence).

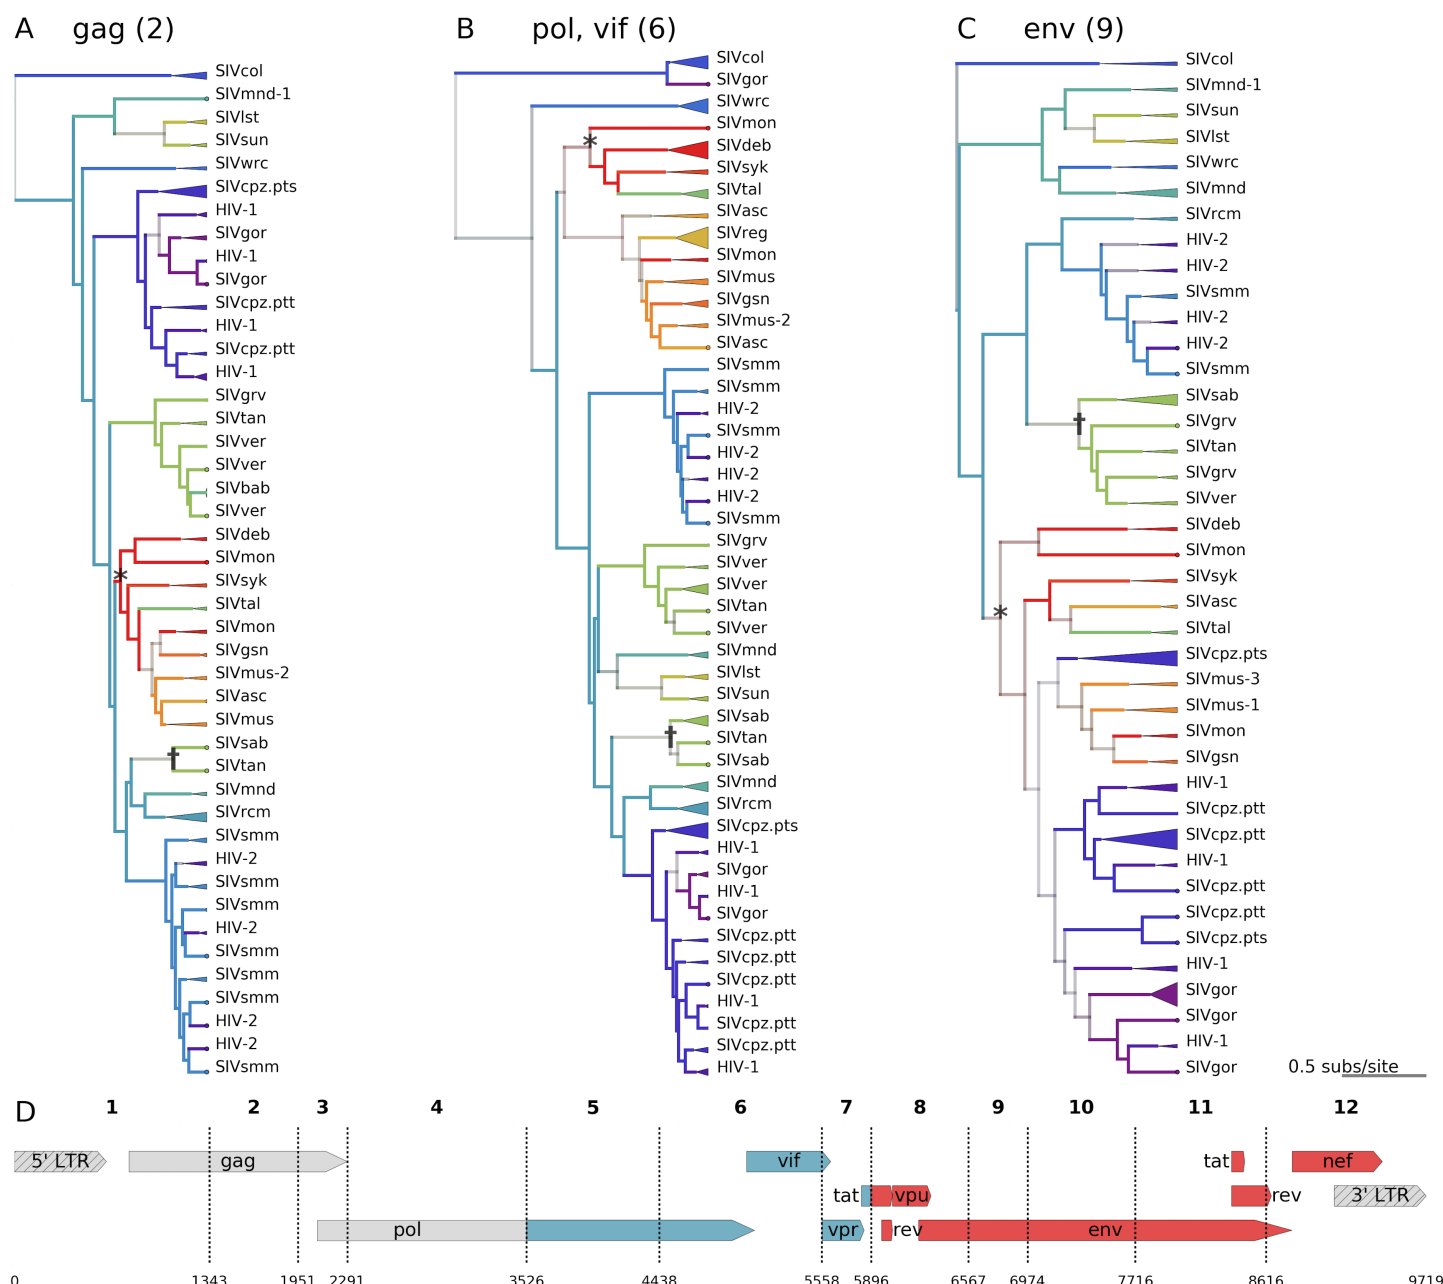

**Figure 2: Cross-species transmissions are inferred from tree topologies; SIVcpz has mosaic origins.**

**A,B,C** - Bayesian maximum clade credibility (mcc) trees are displayed for segments 2 (*gag* - **A**), 6 (*int* and *vif* - **B**), and 9 (*env* - **C**) of the main dataset (N=423). Tips are color coded by known host species; internal nodes and branches are colored by inferred host species, with saturation indicating the confidence of these assignments. Monophyletic clades of viruses from the same lineage are collapsed, with the triangle width proportional to the number of represented sequences. An example of likely cross-species transmission is starred in each tree, where the host state at the internal node (red / mona monkeys) is incongruent with the descendent tips' known host state (green / talapoin monkeys), providing evidence for a transmission from mona monkeys to talapoin monkeys. Another example of cross-species transmission of a recombinant virus among African green monkeys is marked with a dagger.

**D** - The genome map of SIVcpz, with breakpoints used for the discrete trait analysis, is color coded and labeled by the most likely ancestral host for each segment of the genome.

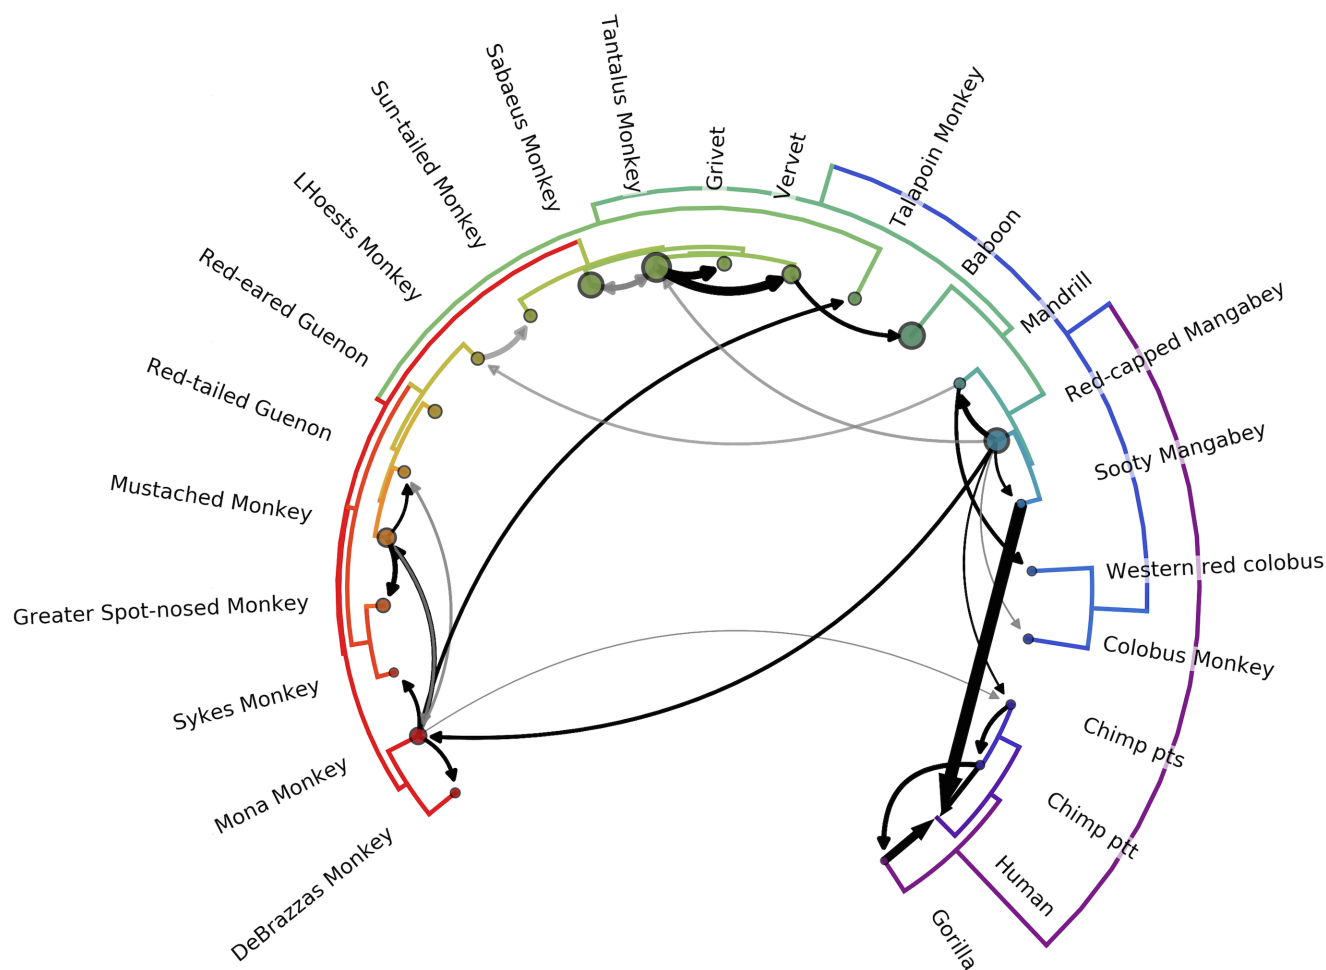

### Figure 3: Most lentiviruses are the product of ancient cross-species transmissions.

The phylogeny of the host species' mitochondrial genomes forms the outer circle. Arrows represent transmission events inferred by the model with Bayes' factor (BF)  $\geq 3.0$ ; black arrows have BF  $\geq 10$ , with opacity of gray arrows scaled for BF between 3.0 and 10.0. Width of the arrow indicates the rate of transmission (actual rates = rates \* indicators). Circle sizes represent network centrality scores for each host. Transmissions from chimps to humans; chimps to gorillas; gorillas to humans; sooty mangabeys to humans; sabaeus to tanzania; and vervets to baboons have been previously documented. To our knowledge, all other transmissions illustrated are novel identifications.

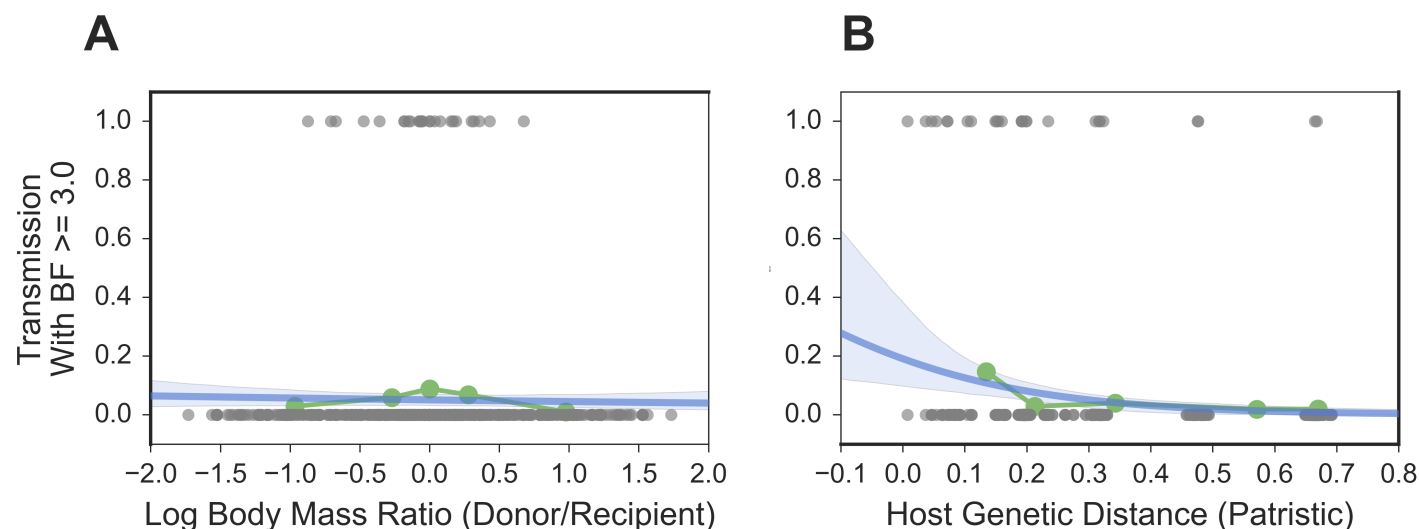

**Figure 4: Cross-species transmission is driven by exposure and constrained by host genetic distance.**

For each pair of host species, we (A) calculated the log ratio of their average body masses and (B) found the patristic genetic distance between them (from a maximum-likelihood tree of mtDNA). To investigate the association of these predictors with cross-species transmission, we treated transmission as a binary variable: 0 if the Bayes factor for the transmission (as inferred by the discrete traits model) was  $< 3.0$ , and 1 for a Bayes factor  $\geq 3.0$ . Each plot shows raw predictor data in gray; the quintiles of the predictor data in green; and the logistic regression and 95% CI in blue.

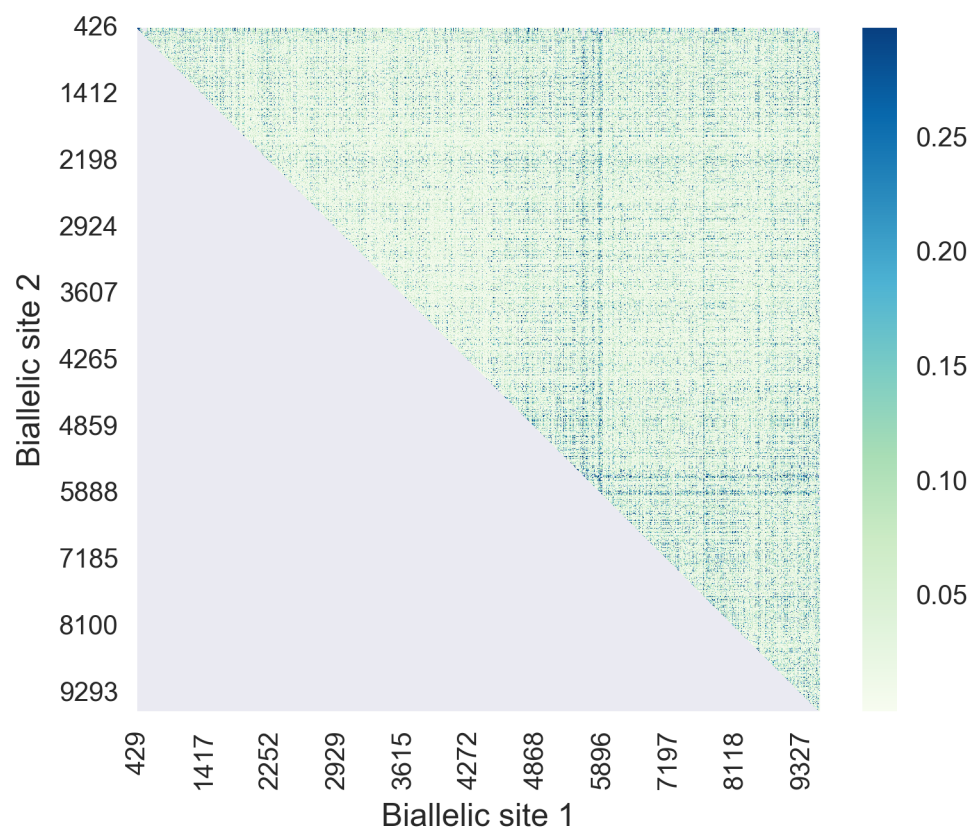

### Figure S1: Extensive divergence makes sitewise measures of genetic linkage ineffective

For pairs of biallelic sites (ignoring rare variants),  $R^2$  was used to estimate how strongly the allele in one site predicts the allele in the second site, with values of 0 indicating no linkage and 1 indicating perfect linkage. The mean value of  $R^2$  was 0.044, indicating very low levels of linkage overall.

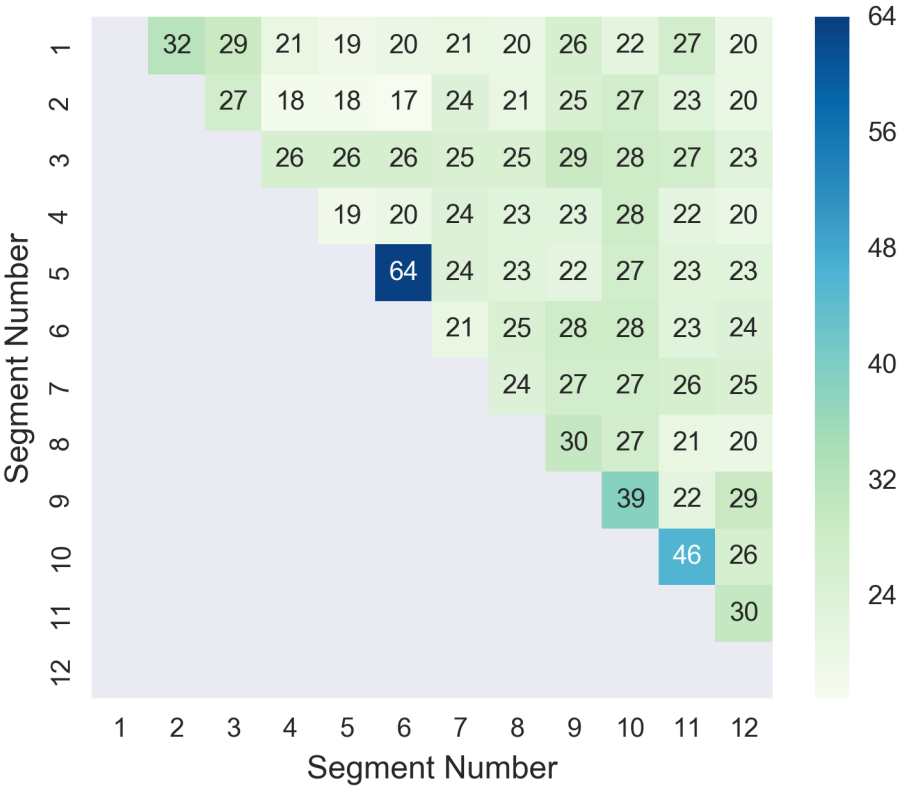

**Figure S2: No evidence of linkage between nonadjacent segments of the SIV genome.**

The alignment used for GARD analyses (LANL compendium with HIV overrepresentation reduced) was split along the breakpoints identified by GARD to yield the 12 genomic segments, and a maximum likelihood tree was constructed for each. The number of steps required to turn one tree topology into another was assessed for each pair of trees with the Rooted Subtree-Prune-and-Regraft (rSPR) package. Segment pairs with similar topologies have lower scores than segments with less similar topologies.

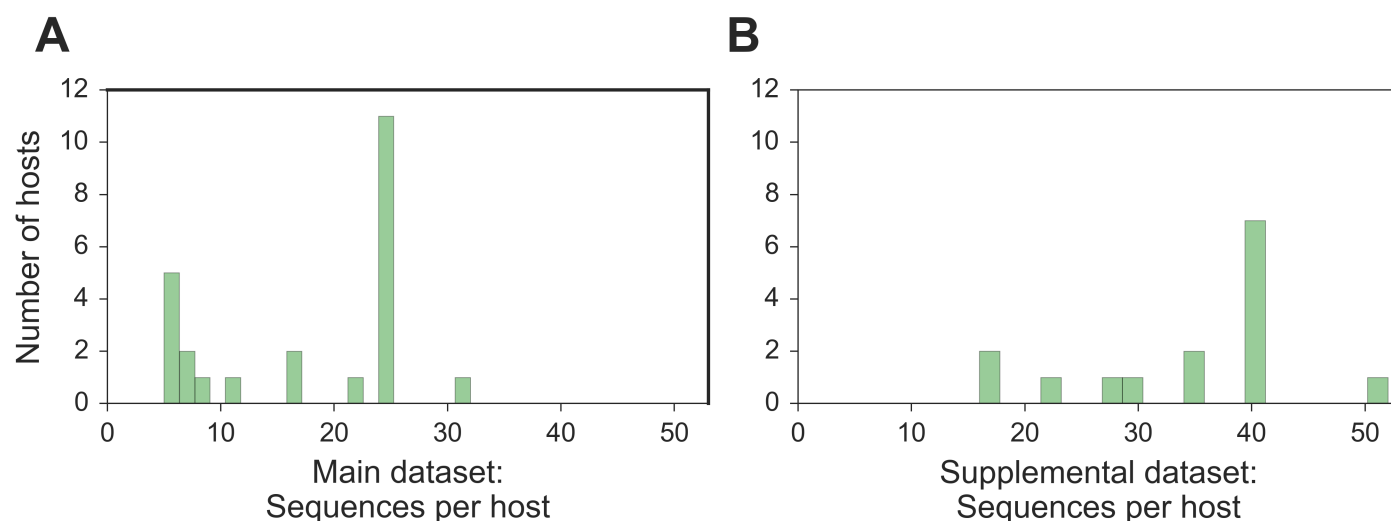

**Figure S3 Distribution of the number of sequences per host included in analyses**

A: All available high-quality lentivirus sequences were randomly subsampled up to 25 sequences per host for the main dataset. We included the 24 hosts with at least 5 sequences available in this dataset. B: For the supplemental dataset, we randomly subsampled up to 40 sequences per host, and included the 15 hosts with at least 16 sequences available in this dataset. For both datasets, a small number of additional sequences were permitted for the few hosts that are infected by multiple viral lineages in order to represent the full breadth of known genetic diversity of lentiviruses in each host population.



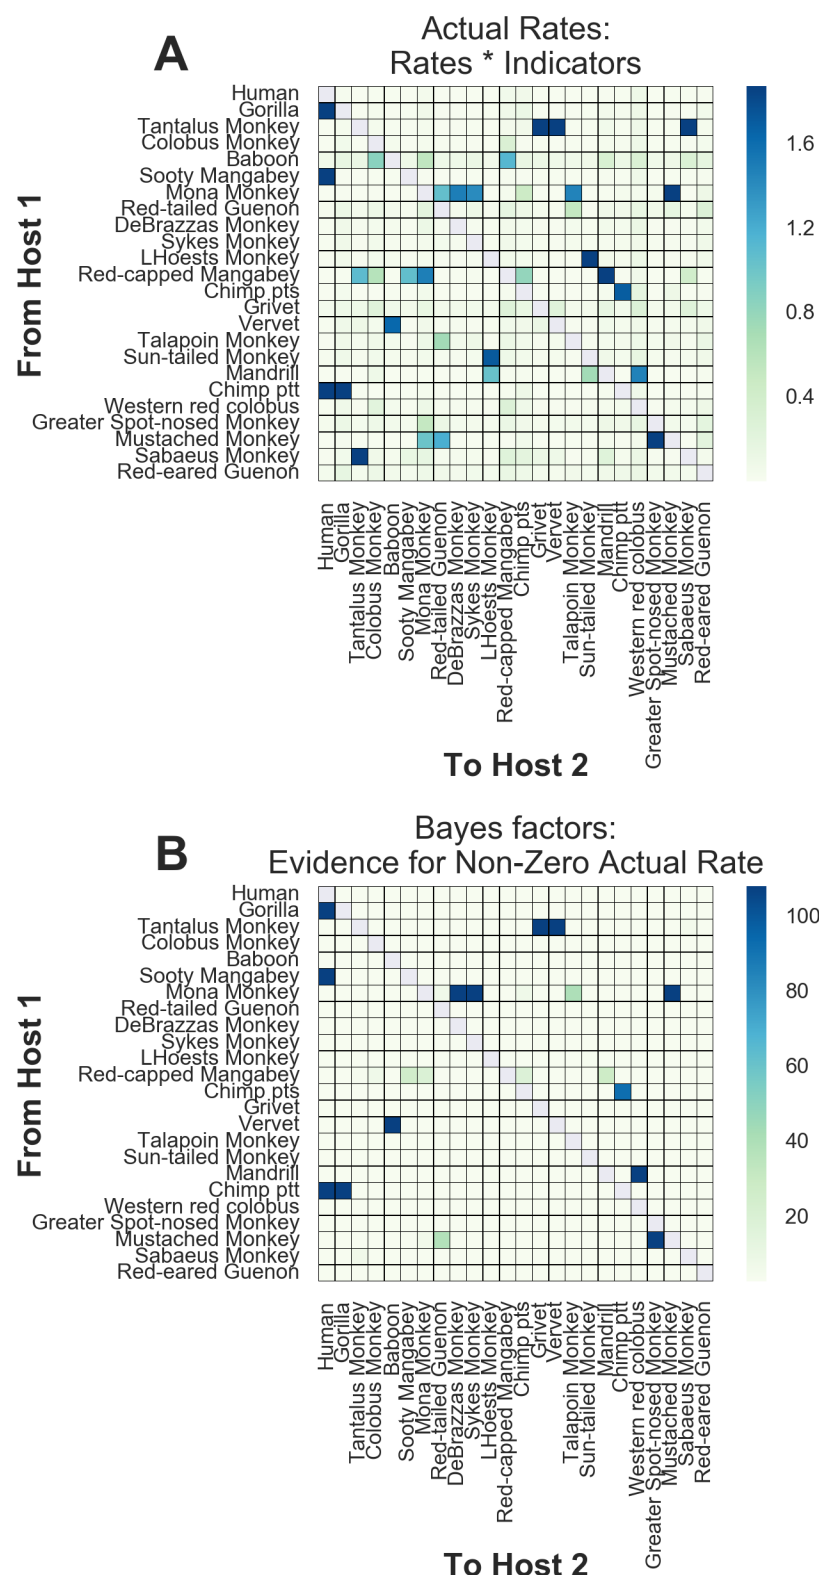

**Figure S4: Actual rates and Bayes factors for main dataset discrete trait analyses**

Values for the asymmetric transition rates between hosts, as estimated by the CTMC, were calculated as rate \* indicator (element-wise for each state logged). We report the average posterior values above. Bayes factors represent a ratio of the posterior odds / prior odds that a given actual rate is non-zero. Because each of the 12 segments contributes to the likelihood, but they have not evolved independently, we divide all Bayes factors by 12 and report the adjusted values above (and throughout the text).

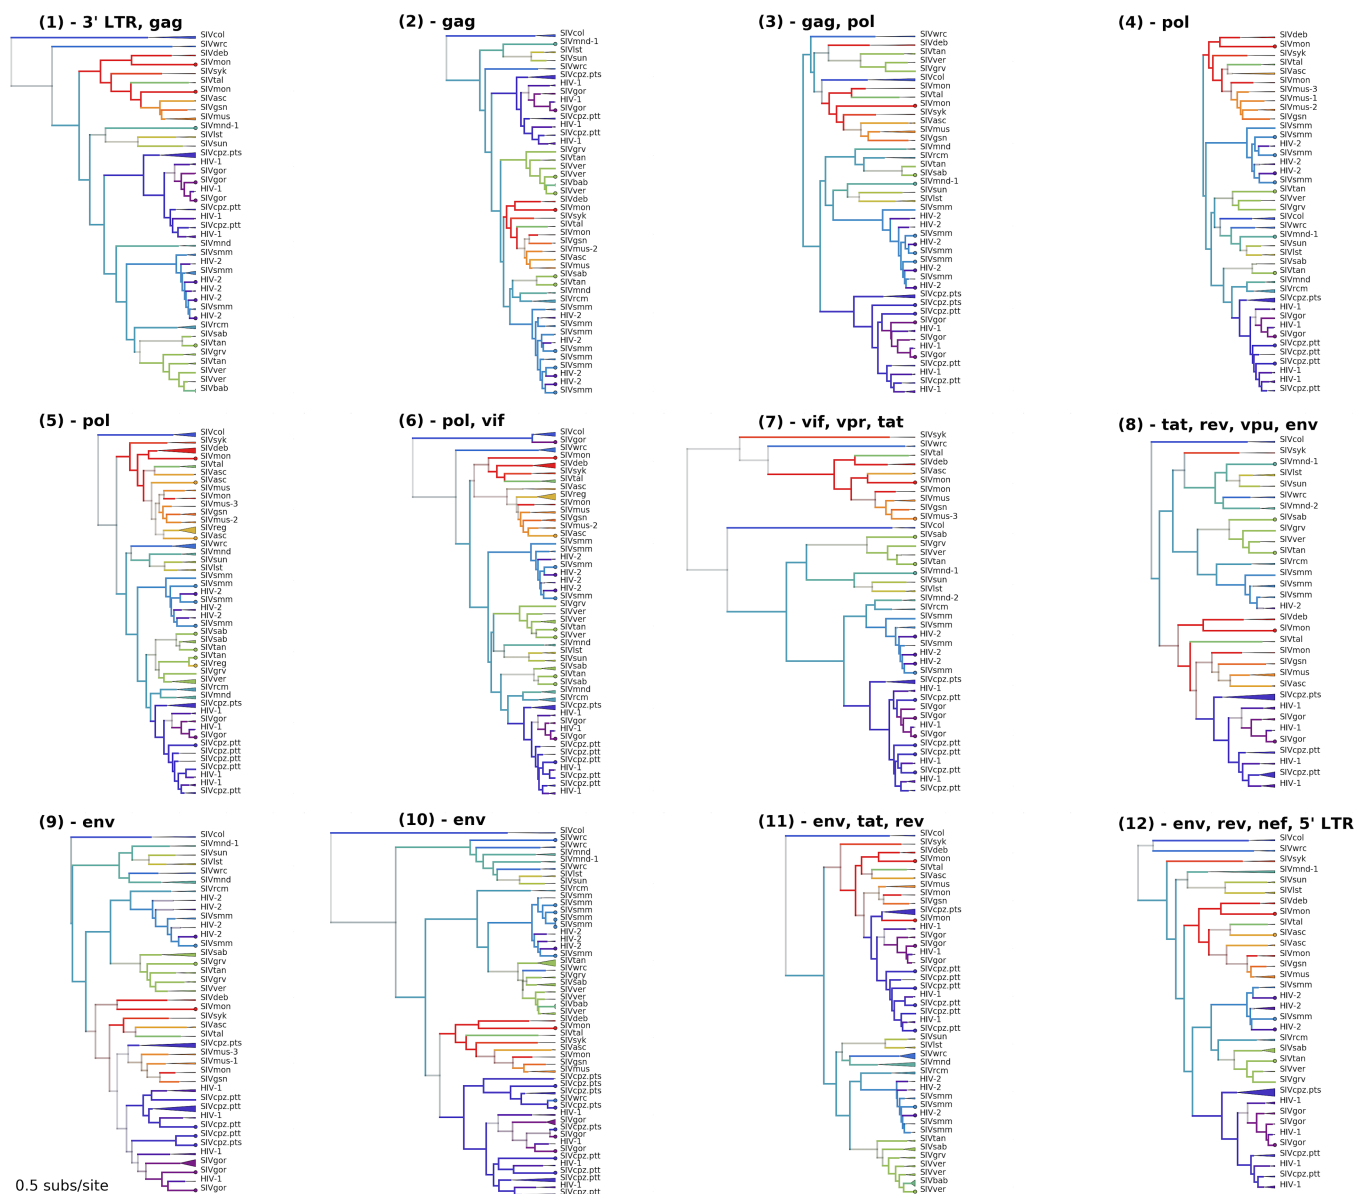

**Figure S5: Maximum clade credibility trees for each of the 12 GARD-identified genomic segments of the lentiviral genome**

Tips are color coded by known host state; branches and internal nodes are color coded by inferred host state, with color saturation indicating the confidence of these assignments. Monophyletic clades of viruses from the same lineage are collapsed, with the triangle width proportional to the number of represented sequences.

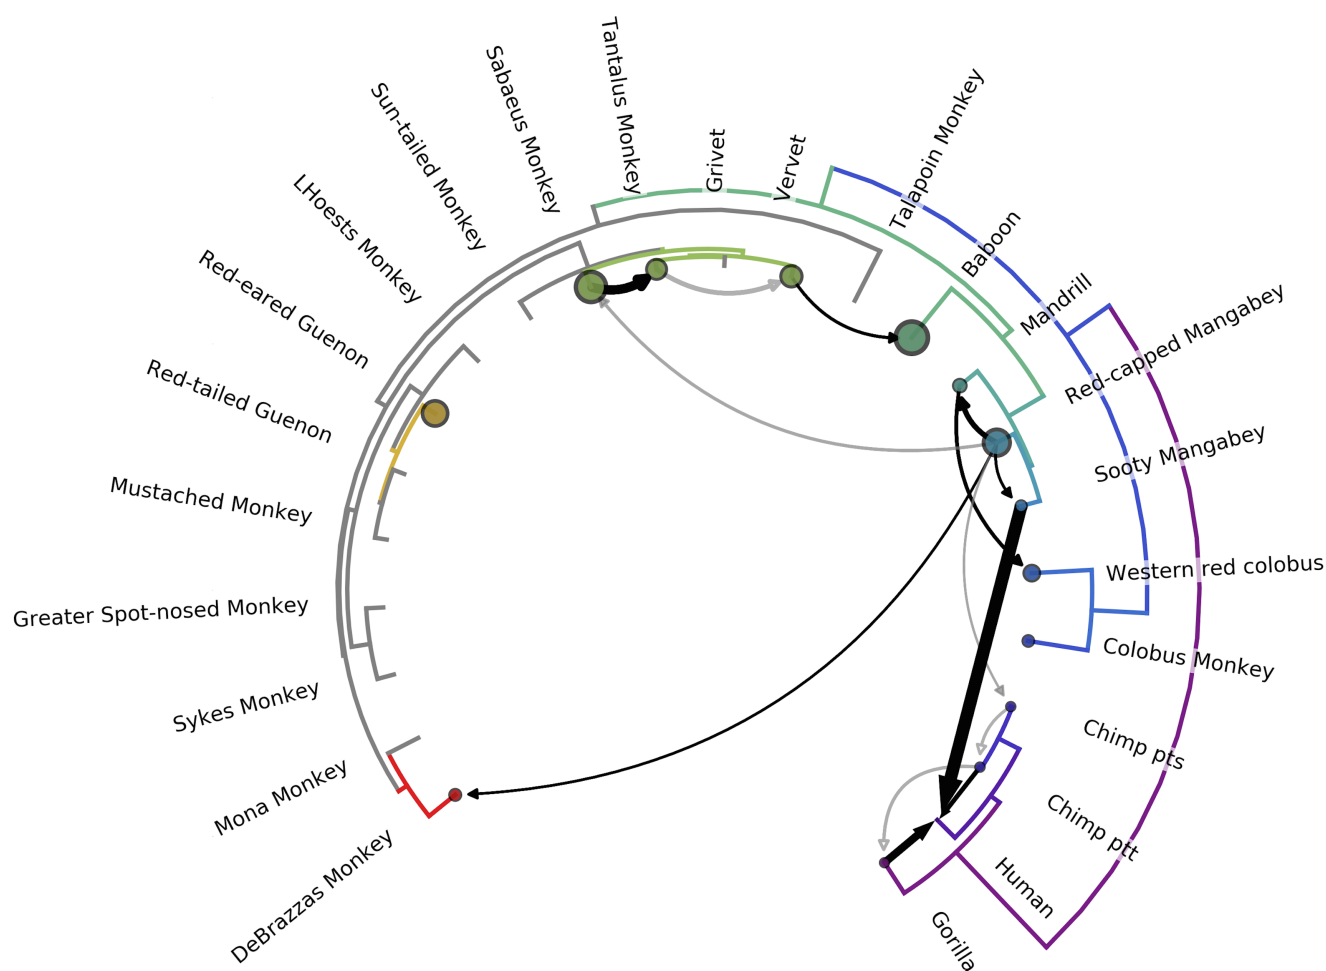

**Figure S6: Most lentiviruses are the product of ancient cross-species transmissions (supplemental dataset).**

The phylogeny of the host species' mitochondrial genomes forms the outer circle (gray: not included in supplemental dataset). Arrows with filled arrowheads represent transmission events inferred by the model with Bayes' factor (BF)  $\geq 3.0$ ; black arrows have BF  $\geq 10$ , with opacity of gray arrows scaled for BF between 3.0 and 10.0. Transmissions with  $2.0 \leq \text{BF} < 3.0$  have open arrowheads. Width of the arrow indicates the rate of transmission (actual rates = rates \* indicators). Circle sizes represent network centrality scores for each host. Transmissions from chimps to humans; chimps to gorillas; gorillas to humans; sooty mangabeys to humans; sabaeus to tantalus; and vervets to baboons have been previously documented. To our knowledge, all other transmissions illustrated are novel identifications.

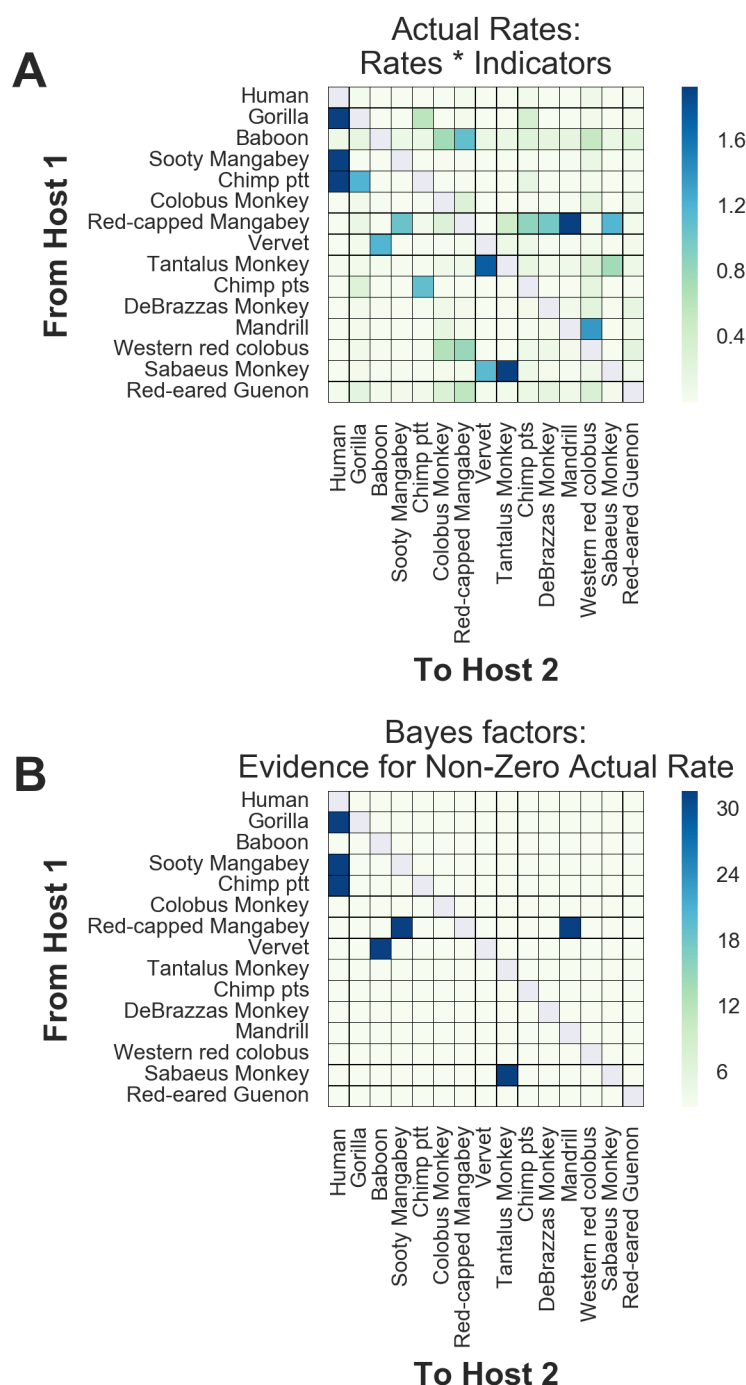

**Figure S7: Actual rates and Bayes factors for supplemental dataset discrete trait analyses**

Values for the asymmetric transition rates between hosts, as estimated by the CTMC, were calculated as rate \* indicator (element-wise for each state logged). We report the average posterior values above. Bayes factors represent a ratio of the posterior odds / prior odds that a given actual rate is non-zero. Because each of the 12 segments contributes to the likelihood, but they have not evolved independently, we divide all Bayes factors by 12 and report the adjusted values above (and throughout the text).

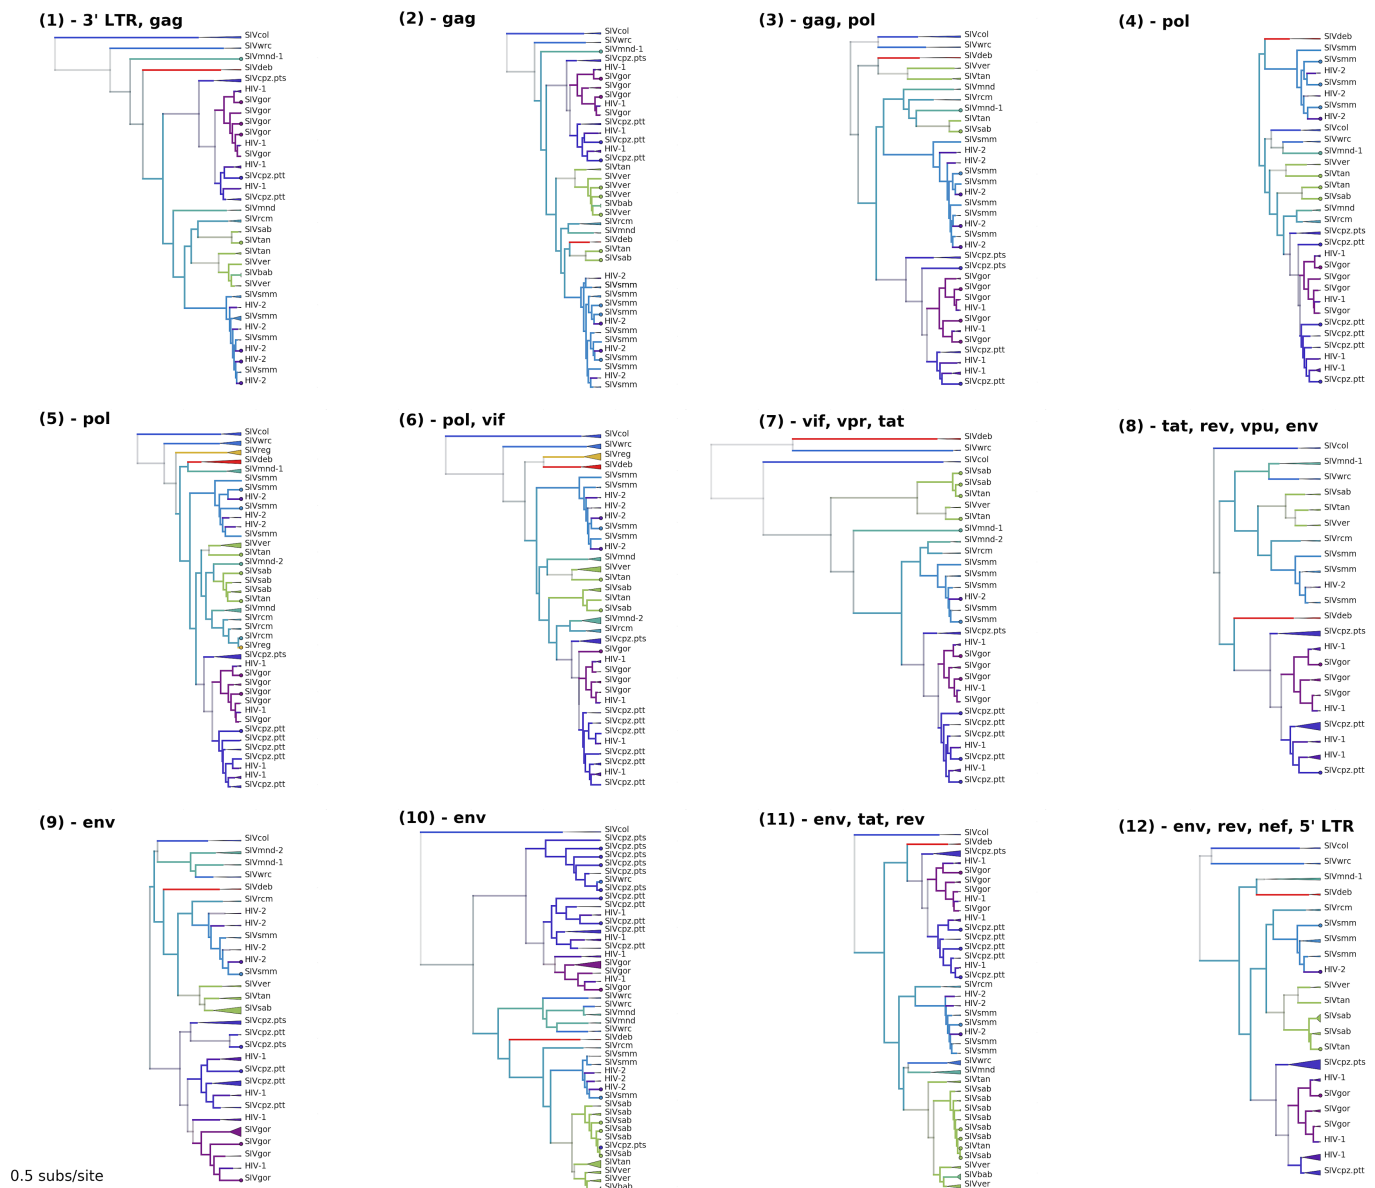

**Figure S8: Maximum clade credibility trees for each of the 12 GARD-identified genomic segments of the lentiviral genome (supplemental dataset)**

Tips are color coded by known host state; branches and internal nodes are color coded by inferred host state, with color saturation indicating the confidence of these assignments. Monophyletic clades of viruses from the same lineage are collapsed, with the triangle width proportional to the number of represented sequences.

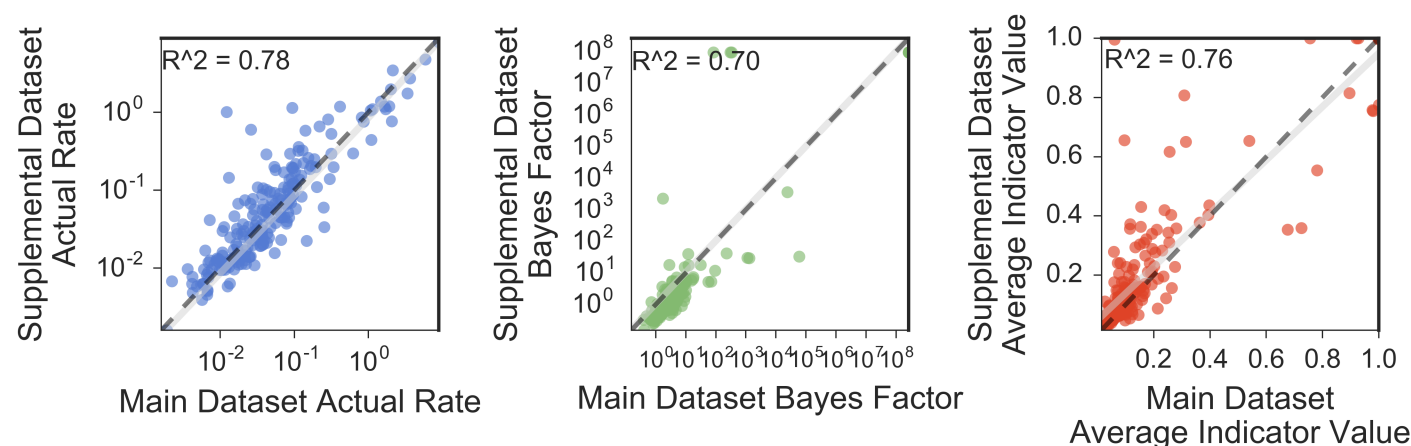

**Figure S9: Comparison of Main and Supplemental Dataset Discrete Trait Analysis Results**

Each datapoint represents one of the 210 possible transmissions between each pair of the 15 hosts present in both datasets. The black dashed line shows  $y=x$ ; the linear regression and 95% CI are shown in gray.
